# Supplementary material for: Multidimensional analysis of the role of BRI3BP in the occurrence, development and prognosis of esophageal cancer
Source: Research Square preprint supplement (doi:10.21203/rs.3.rs-6664868/v1), 2025-07-14
Supplement: Supplementary file 1 [file 796dbf2768b5f99b454be846.docx]

Table 1 Clinicopathological information of patients in the high and low BRI3BP expression groups.

| Characteristics | Low expression of BRI3BP  (N=81) | High expression of BRI3BP  (N=81) | P value |
| --- | --- | --- | --- |
| Age, n (%) |  |  | 0.5296 |
| <= 60 | 39 (24.1%) | 43 (26.5%) |  |
| > 60 | 42 (25.9%) | 38 (23.5%) |  |
| Gender, n (%) |  |  | 0.4995 |
| Female | 13 (8%) | 10 (6.2%) |  |
| Male | 68 (42%) | 71 (43.8%) |  |
| Race, n (%) |  |  | 0.0605 |
| Asian | 22 (15.3%) | 16 (11.1%) |  |
| Black or African American | 5 (3.5%) | 0 (0%) |  |
| White | 49 (34%) | 52 (36.1%) |  |
| BMI, n (%) |  |  | < 0.05 |
| <= 25 | 49 (32%) | 35 (22.9%) |  |
| > 25 | 28 (18.3%) | 41 (26.8%) |  |
| Smoker, n (%) |  |  | 1.0000 |
| No | 26 (18.1%) | 22 (15.3%) |  |
| Yes | 52 (36.1%) | 44 (30.6%) |  |
| Alcohol history, n (%) |  |  | 0.4993 |
| No | 22 (13.8%) | 25 (15.7%) |  |
| Yes | 59 (37.1%) | 53 (33.3%) |  |
| Histological type, n (%) |  |  | < 0.001 |
| Adenocarcinoma | 23 (14.2%) | 58 (35.8%) |  |
| Squamous Cell Carcinoma | 58 (35.8%) | 23 (14.2%) |  |
| Histologic grade, n (%) |  |  | 0.2398 |
| G1 | 11 (8.7%) | 5 (3.9%) |  |
| G2 | 35 (27.6%) | 31 (24.4%) |  |
| G3 | 20 (15.7%) | 25 (19.7%) |  |
| Pathologic stage, n (%) |  |  | 0.0818 |
| Stage I | 7 (4.9%) | 9 (6.3%) |  |
| Stage II | 43 (30.3%) | 26 (18.3%) |  |
| Stage III | 22 (15.5%) | 27 (19%) |  |
| Stage IV | 2 (1.4%) | 6 (4.2%) |  |
| Pathologic T stage, n (%) |  |  | 0.1146 |
| T1 | 11 (7.6%) | 16 (11%) |  |
| T2 | 22 (15.2%) | 15 (10.3%) |  |
| T3 | 39 (26.9%) | 38 (26.2%) |  |
| T4 | 4 (2.8%) | 0 (0%) |  |
| Pathologic N stage, n (%) |  |  | < 0.001 |
| N0 | 43 (29.9%) | 23 (16%) |  |
| N1&N2&N3 | 31 (21.5%) | 47 (32.6%) |  |
| Pathologic M stage, n (%) |  |  | 0.2266 |
| M0 | 65 (50.4%) | 56 (43.4%) |  |
| M1 | 2 (1.6%) | 6 (4.7%) |  |
